1 **Frequent shedding of multi-drug resistant pneumococci among adults living with**  
2 **HIV on suppressive antiretroviral therapy in Malawi**

3  
4 Lusako Sibale<sup>1,2†</sup>, Joseph Phiri<sup>1,2†</sup>, Ndaona Mitole<sup>1</sup>, Newton Kalata<sup>1</sup>, Tinashe Nyazika<sup>2</sup>,  
5 Alice Kalirani<sup>1</sup>, Mercy Khwiya<sup>1</sup>, Gift Sagawa<sup>1</sup>, Deus Thindwa<sup>1</sup>, Todd D Swarthout<sup>3</sup>, Neil  
6 French<sup>4</sup>, Ken Malisita<sup>5</sup>, Arox Kamng'ona<sup>6</sup>, Daniela M Ferreira<sup>2,7</sup>, Robert S. Heyderman<sup>3</sup>,  
7 Brenda A. Kwambana-Adams<sup>1,2,3</sup>, Kondwani Jambo<sup>1,2\*</sup>.

- 8  
9 1. Malawi-Liverpool-Wellcome Programme, Blantyre, Malawi  
10 2. Department of Clinical Sciences, Liverpool School of Tropical Medicine, Liverpool,  
11 UK  
12 3. NIHR Global Health Research Unit on Mucosal Pathogens, Division of Infection  
13 and Immunity, University College London, WC1E 6JF, London, UK  
14 4. Institute of Infection Veterinary & Ecological Science, University of Liverpool, L69  
15 3GE, Liverpool, UK  
16 5. Lighthouse-Queens Elizabeth Hospital and Gateway Health Centre, Blantyre,  
17 Malawi  
18 6. School of Life Science and Allied Health Professions, Kamuzu University of Health  
19 Sciences, Blantyre, Malawi  
20 7. Oxford Vaccine Group, University of Oxford, Oxford, UK

21  
22 **\*Corresponding author**

23 **Email:** [Kondwani.Jambo@lstmed.ac.uk](mailto:Kondwani.Jambo@lstmed.ac.uk) or [kjambo@mlw.mw](mailto:kjambo@mlw.mw) (KCJ)

24  
25 **† Contributed equally to this manuscript**

26  
27 **Running title:** PLHIV shed multi-drug resistant pneumococci

28 **Keywords:** HIV, ART, *Streptococcus pneumoniae*, carriage, AMR

29 **Word count:** 3735 words

NOTE: This preprint reports new research that has not been certified by peer review and should not be used to guide clinical practice.

30 **Abstract**

31 People living with human immunodeficiency virus (PLHIV) on antiretroviral therapy  
32 (ART) are reported to have three times higher carriage of *Streptococcus pneumoniae*  
33 than their HIV-uninfected counterparts in point prevalence studies. Using a  
34 longitudinal cohort study design, we assessed pneumococcal carriage density,  
35 shedding and antibiotic resistance profiles, as well as nasal mucosal immunity, in  
36 otherwise healthy PLHIV on ART for at least one year, compared to HIV-uninfected  
37 participants in Malawi. Pneumococcal carriage density was higher among PLHIV  
38 compared to HIV-uninfected participants. Moreover, PLHIV were twice more likely to  
39 shed pneumococci than HIV-uninfected participants. In PLHIV, aerosol shed  
40 pneumococci were more often multi-drug resistant (MDR) than nasopharyngeal  
41 carried isolates recovered from the same individual. Consistent with high shedding,  
42 PLHIV exhibited heightened neutrophil-mediated nasal mucosa inflammation. We  
43 propose that PLHIV should be considered in intervention strategies, such as  
44 vaccination, as they could be an important reservoir for transmission of MDR *S.*  
45 *pneumoniae*.

46

47

48

49

50

51

52

53

54

55

56 **Word count:** 149 words

57

58

## 59 Introduction

60 *Streptococcus pneumoniae* has at least 100 distinct serotypes<sup>1, 2</sup> and is a common  
61 coloniser of the human nasopharynx. Pneumococcal carriage is a prerequisite for life-  
62 threatening invasive pneumococcal disease (IPD) including pneumonia, meningitis,  
63 and bacteraemia<sup>3</sup>, and is critical for transmission<sup>4</sup>. In high- and middle-income  
64 countries, infant pneumococcal conjugate vaccine (PCV) programmes have resulted  
65 in a significant reduction in pneumococcal carriage and IPD in both vaccinated  
66 children (direct protection) and unvaccinated older children and adults (indirect  
67 protection)<sup>5, 6, 7, 8</sup>. However, in low-income countries such as Malawi, where the 13-  
68 valent PCV (PCV13) was introduced into the infant immunisation programme in 2011,  
69 there is limited indirect protection among unvaccinated older children and adults  
70 despite evidence of substantial direct protection against IPD among vaccinated  
71 children<sup>9</sup>.

72  
73 Moreover, pneumococcal carriage prevalence has been reported to be over two-fold  
74 higher in PLHIV on antiretroviral therapy (ART) (40-60%) than in those HIV-  
75 uninfected (8-15%) or ART-naïve PLHIV (18-25%)<sup>10, 11</sup>. Residual carriage of all PCV13  
76 serotypes (VTs) among Malawian adults living with HIV on ART has remained  
77 relatively high<sup>7, 11</sup>, with low socioeconomic status having been shown to exacerbate  
78 overall carriage prevalence<sup>12</sup>.

79  
80 Emergence of pneumococcal antimicrobial resistance (AMR) is associated with  
81 carriage and antibiotic usage<sup>13, 14, 15</sup>. *S. pneumoniae* is among the priority bacterial  
82 pathogens due to its increased resistance to penicillin according to World Health  
83 Organisation (WHO) Global Antimicrobial Resistance and Use Surveillance System  
84 (GLASS)<sup>16</sup>. It has been shown that PLHIV are more likely to take antibiotics, including  
85 cotrimoxazole prophylaxis to prevent opportunistic bacterial infections<sup>17, 18</sup>.  
86 Moreover, PLHIV are also at increased risk of disease caused by respiratory viruses  
87 compared to the general population<sup>19, 20</sup>. Common viral co-infections<sup>21, 22, 23</sup>,

88 including Respiratory Syncytial Virus (RSV) and Influenza <sup>24</sup>, have been shown to  
89 promote high pneumococcal carriage density that in turn drives increased bacterial  
90 shedding <sup>21, 25, 26</sup>, a surrogate for transmission potential <sup>27, 28</sup>. Furthermore, high  
91 pneumococcal carriage density has been shown to associate with invasive  
92 pneumococcal disease <sup>29, 30</sup>. Together, this may suggest that in addition to being at  
93 increased risk of invasive pneumococcal disease, PLHIV could be an  
94 underappreciated reservoir driving transmission of antimicrobial resistant  
95 pneumococci in the community, calling for an in-depth evaluation of this population.

96  
97 Using a longitudinal cohort study, we investigated pneumococcal carriage density  
98 and shedding, as well as nasal immunity, in otherwise healthy PLHIV on ART for more  
99 than one year and HIV-uninfected participants. We show that PLHIV exhibit higher  
100 density pneumococcal carriage and more commonly shed antimicrobial resistant  
101 pneumococci. These findings have broader implications in the development of  
102 interventions to curb AMR pneumococcal disease and transmission.

103

## 104 **Results**

### 105 *Clinical and demographic characteristics*

106 Between July 2019 and August 2021, we screened 512 adults among whom 28%  
107 (144/512) had confirmed pneumococcal carriage and thus eligible for recruitment  
108 (Fig. 1). Of these, 37.5% (54/144) were HIV-uninfected and 62.5% (90/144) were  
109 PLHIV on ART for more than 1 year (median 5.5 years [IQR 2.8-10.1]) (Table S1). Due  
110 to Coronavirus disease (COVID-19) pandemic restrictions, 37.5% (54/144) did not  
111 complete the study follow-up period of 5 months (Fig. 1). Therefore, the final analysis  
112 is restricted to the 35 HIV-uninfected participants and 55 PLHIV that completed the 5  
113 months follow-up period. PLHIV, compared to HIV-uninfected participants were  
114 older, with 44% (24/55) and 20% (7/35) >36 years old, respectively (p=0.049).  
115 Likewise, compared to HIV-uninfected participants, PLHIV had a lower socioeconomic  
116 status as measured by asset ownership index <sup>12</sup> (median 4 [IQR 2.0-5.0] vs. 6 [3.5-

117 7.50],  $p=0.005$ ), and a lower CD4 count (median 514 cells/ $\mu\text{l}$  [IQR 652-927] vs. 760  
118 cells/ $\mu\text{l}$  [IQR [332-750],  $p<0.001$ ) (Table 1).

119

### 120 *Higher NVT carriage positivity in PLHIV than HIV-uninfected participants*

121 Overall (VT + non-VT [NVT]) pernasal swab pneumococcal positivity was higher  
122 among PLHIV compared to HIV-uninfected participants (72% [95% CI 68.2–76.2] vs.  
123 59% [53.7–64.8]  $p<0.001$ ) (Fig. 2a). Furthermore, NVT pernasal swab pneumococcal  
124 positivity was higher in PLHIV (55.5% [51.2–59.7] vs. 44.9% [39.6–50.2],  $p=0.002$ ) (Fig.  
125 2b). In contrast, VT pernasal swab pneumococcal positivity was similar between  
126 PLHIV and HIV-uninfected participants: 19.6% [16.4–23.2] and 18.6% [14.6-23.0],  
127  $p=0.5777$  (Fig. 2a). The dominant VT carriage isolates among both PLHIV, and HIV-  
128 uninfected participants were serotype 3 (49.1% and 43.1%) and serotype 19F (19.4%  
129 and 29.2%) respectively (Fig. 2c). Using a multivariable logistic regression model  
130 (adjusting for age, gender, season, socioeconomic status and HIV status), showed  
131 that PLHIV were more likely to carry NVT than HIV-uninfected participants (adjusted  
132 odds ratio (aOR) 1.4, (95% CI 1.1-1.9,  $p=0.015$ )) (Table S2a). In contrast, the likelihood  
133 of having VT carriage was similar between PLHIV and HIV-uninfected participants  
134 (aOR 1.0, (95% CI 0.7-1.5,  $p>0.9$ ) (Table S2b). Together, these data show that high  
135 pneumococcal carriage prevalence in PLHIV is mostly driven by NVT, but also  
136 highlight high residual VT carriage of serotype 3 and 19F in both PLHIV and HIV-  
137 uninfected participants.

138

### 139 *Higher density pneumococcal carriage in PLHIV than HIV-uninfected participants*

140 The overall median pneumococcal carriage density was higher among PLHIV  
141 (40,738.03CFU/ml [95% CI 16218.1-104712.9] vs. 10,000.00CFU/ml [4466.84-  
142 22908.68],  $p<0.001$ ) (Fig. 3). In a multivariable logistic regression model (adjusting for  
143 sex, age, carriage density, season, and socioeconomic status), PLHIV were more likely  
144 to harbour higher density carriage than HIV-uninfected participants (aOR 1.6, 1.1-2.5,

145 p=0.027) (Table 2). Collectively, these findings show high propensity for high-density  
146 carriage in PLHIV.

147

148 *Higher proportion of pneumococcal shedding in PLHIV than HIV-uninfected*  
149 *participants*

150 Considering the high-density carriage in PLHIV, we sought to determine whether  
151 they were also more likely to shed pneumococci than HIV-uninfected participants.  
152 The overall proportion of adults shedding pneumococci using either sampling  
153 technique was significantly higher among PLHIV than HIV-uninfected participants  
154 (57.6% [95% CI 48.4-66.4] vs. 27.3% [18.3-45.4],  $p < 0.001$ ) (Fig. 3a). Further analysis  
155 revealed that NVT were shed more frequently in PLHIV than HIV-uninfected  
156 participants (31.6% [25.9-37.8] vs. 11.2% [5.7-19.2],  $p < 0.001$ ) (Fig. 3b). However, VT  
157 shedding was similar between PLHIV on ART and HIV-uninfected participants (6%  
158 [3.4-9.7] vs. 5.1% [1.7-11.5],  $p = 0.946$ ) (Fig. 3b). Among the shed VT isolates, serotype  
159 3 (73.3% and 40%) and serotype 19F (13.3% and 60%) were dominant among both  
160 the PLHIV and HIV-uninfected participants, respectively (Fig. 3c). Moreover, the  
161 overall proportion of adults shedding pneumococci were significantly higher in both  
162 the mechanical (40.3% [95% CI 31.6-49.5] vs. 18.4% [8.8-32],  $p = 0.010$ ) and aerosol  
163 (36% [95% CI 27.6-45.1] vs. 14.3% [95% CI 5.9-27.2],  $p = 0.009$ ) samples in PLHIV than  
164 HIV-uninfected participants (Fig 3d-e).

165

166 To identify factors influencing pneumococcal shedding, we performed a multivariable  
167 logistic regression analysis that included age, gender, socioeconomic status, season,  
168 pneumococcal carriage density, and HIV status. HIV status and pneumococcal  
169 carriage density were significantly associated with pneumococcal shedding (Table 3).  
170 Specifically, PLHIV were twice more likely to shed any pneumococci than HIV-  
171 uninfected participants (aOR 2.4, 95% CI 1.04-5.7,  $p = 0.039$ ), while individuals with  
172 high-density pneumococcal carriage, irrespective of HIV status, were greater than  
173 three times more likely to shed any pneumococci than those with low-density

174 carriage (aOR 3.37, 1.56-7.29, p=0.002) (Table 3). Together, these findings show that  
175 high proclivity for pneumococcal shedding in PLHIV, and in individuals with high  
176 density carriage (irrespective of HIV status).

177

#### 178 *PLHIV shed antimicrobial resistant pneumococci*

179 Next, we sought to assess the antimicrobial susceptibility profile of the carried and  
180 shed isolates from PLHIV and HIV-uninfected participants. Overall, the antimicrobial  
181 susceptibility profile of nasopharyngeal carriage isolates was similar between PLHIV  
182 compared and HIV-uninfected participants (Table 5). However, the proportion of co-  
183 trimoxazole resistant isolates was significantly higher in PLHIV (98% [95% CI 88%-  
184 100%] vs. 76% [58%-89%], p=0.002) (Table 4). The overall proportion of non-  
185 susceptible tetracycline (Tet), benzylpenicillin (PenG), as well as multi-drug resistant  
186 isolates were significantly higher in aerosol shed isolates compared to  
187 nasopharyngeal carriage isolates in PLHIV for samples collected from the same  
188 individual (Tet, 61% [95% CI 46%-75%] vs. 26% [14%-41%], p<0.001; PenG, 61%  
189 [46%-75%] vs. 32% [19%-48%], p=0.010; MDR, 64% [48%-77%] vs. 30% [CI 17%-  
190 45%], p=0.001) (Table 5). In contrast, the AMR profile of mechanical shed isolates  
191 were similar to the nasopharyngeal carriage isolates (Table 6). Among HIV-uninfected  
192 participants, no differences were observed in the antimicrobial susceptibility profile  
193 between shed and carriage isolates, irrespective of the shedding route (Table S3).  
194 Together, these data show that PLHIV shed multi-drug resistant pneumococci,  
195 especially via the aerosol route.

196

#### 197 *PLHIV exhibit neutrophil-mediated inflammation in the nasal mucosa*

198 Lastly, we sought to determine whether PLHIV have a more inflamed nasal mucosa  
199 than HIV-uninfected adults, as inflammation has been shown to play a significant  
200 role in pneumococcal shedding<sup>31, 32, 33</sup>. To do this, we recruited PLHIV on ART for  
201 more than 1 year, and age- and gender-matched HIV-uninfected adult controls,  
202 irrespective of pneumococcal carriage status, from whom nasal cells and nasal lining

203 fluid samples were collected weekly for 5 weeks (Fig. S1). Using flow cytometry-  
204 based immunophenotyping, we characterised the immune cell composition in the  
205 nasal mucosa, a representative gating strategy is shown in Fig 5a. The abundance of  
206 CD14<sup>+</sup> monocytes (median ratio 0.01 [95% CI 0.001-0.011] vs 0.01 [95% CI 0-0.014],  
207 p=0.55) and CD3<sup>+</sup> T cells (median ratio 0.04 [95% CI 0.01-0.07] vs 0.05 [95% CI 0.02-  
208 0.08], p=0.66) was similar between the two study groups (Fig 5b-c). In contrast, the  
209 abundance of neutrophils (median ratio 0.30 [95% CI 0.17-0.43] vs. 0.17 [95% CI 0.06-  
210 0.28], p=0.018) was higher in PLHIV than HIV-uninfected participants (Fig 5d).

211

212 To get further understanding of the phenotype of neutrophils, we measured the  
213 expression of CD62L, which is down regulated during neutrophil activation <sup>34, 35</sup>.  
214 Neutrophils from PLHIV had lower expression of CD62L than those from HIV-  
215 uninfected participants (Median fluorescent intensity (MFI) 310 [95% CI 264-356] vs.  
216 399 [95% CI 345-453], p=0.017) (Fig 5e). Furthermore, PLHIV had higher  
217 concentrations of neutrophil pro-inflammatory markers in their nasal lining fluid  
218 including neutrophil extracellular traps (NETs) (3.9 ng/ml [95% CI 0-31.7] vs 1.2 ng/ml  
219 [95% CI 0-2.76], p=0.042) and myeloperoxidase (MPO) (393500 pg/ml [95% CI  
220 311066-475934] vs 43425 pg/ml [95% CI 2008-84842], p=0.066), compared to HIV-  
221 uninfected participants (Fig 5f-g). Together, these findings show heightened  
222 inflammation in the nasal mucosa of PLHIV.

223

## 224 Discussion

225 We assessed pneumococcal carriage dynamics in otherwise healthy PLHIV on ART for  
226 more than 1 year compared to HIV-uninfected adults. We found that PLHIV had  
227 high-density pneumococcal carriage and shed antimicrobial resistant *S. pneumoniae*.  
228 Moreover, PLHIV exhibited heightened neutrophil-associated inflammation in the  
229 nasal mucosa. These data highlight this vulnerable HIV-affected population as a  
230 potentially important reservoir for transmission of antimicrobial resistant  
231 pneumococci.



232

233 It is postulated that pneumococcal transmission is primarily through respiratory  
234 droplets<sup>36</sup> but direct contact through hands as a vehicle has also been implicated<sup>27,</sup>  
235<sup>28</sup>. Consistent with this, we observed pneumococcal shedding in adults through nose  
236 poking and coughing. Unlike isolates obtained from the nose poking samples  
237 (nasopharyngeal niche), aerosol shed *S. pneumoniae* (likely from the oropharyngeal  
238 niche) from PLHIV were more frequently penicillin-resistant and multidrug-resistant.  
239 *Streptococcus mitis* and *Streptococcus oralis*, commensals of the human oropharynx,  
240 have been implicated as a potential source of antibiotic resistance genes for *S.*  
241 *pneumoniae*<sup>37, 38, 39, 40</sup>, through horizontal gene transfer (HGT) of penicillin-binding  
242 protein (*pbp*) genes that drive emergence of  $\beta$ -lactam resistance<sup>41, 42</sup>. An analysis of  
243 publicly available pneumococcal genomes has highlighted that *S. mitis* as a more  
244 frequent donor of genetically diverse *pbp* gene fragments to *S.*  
245 *pneumoniae* compared with *S. oralis*, with horizontal acquisition mostly confined to  
246 pneumococcal serotypes associated with prolonged nasopharyngeal carriage  
247 duration<sup>40</sup>. These findings suggest that proximity between *S. pneumoniae* and other  
248 closely-related streptococci species harboring antibiotic resistance genes facilitates  
249 their transfer to pneumococci, and this could in part explain the predominance of  
250 penicillin-resistant pneumococci in the aerosol shed isolates.

251

252 On the other hand, it has been recently shown that there is an elevated risk of both  
253 the acquisition and persistent carriage of multi-drug resistant pneumococci following  
254 antimicrobial treatment<sup>43</sup>. The mechanism of persistence of multi-drug resistant  
255 pneumococci was attributed to reduced within-host competition following  
256 antimicrobial treatment, indicating that in the absence of treatment, susceptible  
257 lineages outcompete resistant lineages<sup>43</sup>. In Malawi, as part of standard HIV clinical  
258 management, PLHIV are put on daily co-trimoxazole prophylaxis<sup>17, 18</sup>. Consistent  
259 with purifying selection and in agreement with previous studies<sup>44, 45</sup>, there was  
260 higher prevalence of co-trimoxazole resistant carriage isolates in PLHIV than HIV-

261 uninfected participants. Considering that co-trimoxazole is a broad-spectrum  
262 antimicrobial and its resistance is associated with penicillin resistance<sup>45, 46</sup>, it could  
263 differentially alter the microbiota in the oropharyngeal and nasopharyngeal  
264 compartments, resulting in stronger selection for multi-drug resistant pneumococci.  
265  
266 Consistent with their increased propensity for pneumococcal shedding, PLHIV  
267 exhibited neutrophil-driven nasal inflammation. Neutrophil factors including NETs  
268 and MPO contribute to clearance of pneumococcal infection<sup>47, 48</sup>, but also promote  
269 excessive inflammation<sup>25, 49</sup>. Host inflammation has been shown to drive  
270 pneumococcal shedding<sup>31, 32, 33 50</sup>. In mice models, pneumococcal virulence factors,  
271 such as pneumolysin and pneumococcal surface protein K (PspK), induce upper  
272 respiratory tract (URT) inflammation resulting in pneumococcal shedding<sup>32, 33, 51</sup>.  
273 Furthermore, uncontrolled inflammation has been shown to promote pneumococcal  
274 persistence via nutrient provision arising from increased mucus secretion<sup>52 53, 54</sup>, and  
275 through reduced mucociliary clearance of pneumococci due to altered ciliary  
276 beating<sup>55</sup>. Together, this suggests that uncontrolled nasal inflammation in PLHIV,  
277 likely due to impaired nasal immunity<sup>10, 56</sup> or driven by altered URT microbiota,  
278 perpetuates nasal inflammation leading to increased pneumococcal shedding, a  
279 surrogate of transmission potential.  
280  
281 Despite the strengths of this study, including a comprehensive assessment of  
282 carriage dynamics in a relevant population and setting, there are important  
283 limitations. First, the standard microbiological assay used in this study were biased  
284 towards isolating single isolates following culture, hence missing any potential  
285 multiple serotype carriage episodes or pneumococci carried at low densities. Second,  
286 we did not directly measure pneumococcal transmission. Although pneumococcal  
287 shedding is regarded as a surrogate for transmission potential<sup>27, 28</sup>, it is not clear  
288 how often shed pneumococci result in successful transmission. However, this does  
289 not discount our suggestion that PLHIV on ART for more than 1 year contribute to

290 transmission of multi-drug resistant pneumococci, which is of public health  
291 importance.

292

293 In conclusion, our study demonstrates that PLHIV on ART for more than 1 year could  
294 be an important reservoir for transmission of multi-drug resistant *S. pneumoniae*.  
295 This has potential to derail the success of the infant PCV programme and our fight  
296 against antimicrobial resistance in high HIV prevalence and high pneumococcal  
297 carriage settings such as Malawi, especially now that there is an HIV test and treat  
298 strategy<sup>57</sup>. Considering that PCV was shown to be efficacious against recurrent IPD  
299 among PLHIV in Malawi<sup>58</sup>, consideration should be given to re-evaluating the  
300 provision of pneumococcal vaccination to this vulnerable adult population.

301

## 302 **Methods**

### 303 *Study design and recruitment*

304 We recruited asymptomatic PLHIV on ART for more than 1 year and HIV-uninfected  
305 adults in Blantyre, Malawi. Participants were recruited on day 3 after screening and  
306 then followed up on day 7, 14, 21 and 28 for the first month, and then every month  
307 for 5 months. All participants were recruited from the ART clinics and Voluntary  
308 Counselling and Testing (VCT) centres at Lighthouse-Queen Elizabeth Central  
309 Hospital and Gateway Health Centre in Blantyre. Briefly, participants were screened  
310 for pneumococcal carriage, using WHO recommendations for nasopharyngeal  
311 sampling and microbiological culture for pneumococcal detection<sup>59</sup>. Inclusion  
312 criteria included confirmed pneumococcal carriage, in adults aged 18 to 45 years,  
313 living with a child aged under-5-years and providing written informed consent.  
314 Exclusion criteria included receiving antibiotics in the previous 4 weeks (apart from  
315 co-trimoxazole prophylaxis as all PLHIV on ART receive daily co-trimoxazole  
316 prophylaxis as per national guidelines<sup>17</sup>), hospitalization for pneumonia in the  
317 previous 4 weeks, having respiratory tract Kaposi's sarcoma or a terminal illness (e.g.,  
318 metastatic malignancy, terminal AIDS). All PLHIV were on standardised ART regimen

319 according to Malawi Ministry of Health 2018 Clinical Management of HIV guidelines  
320 <sup>60</sup>.

321

322 The study was conducted in accordance with good clinical practice (GCP) guidelines  
323 and the Declaration of Helsinki. Ethical approval was obtained from the College of  
324 Medicine Research Ethics Committee (COMREC) (P.11/18/2532) and Liverpool School  
325 of Tropical Medicine Research Ethics Committee (LSTMREC) (19-033).

326

### 327 *Sample collection*

328 Nasopharyngeal swabs were collected at all time points, and a peripheral blood  
329 sample was collected at recruitment (day 3) from PLHIV on ART for measuring CD4  
330 count. In addition, respiratory secretions were collected at day 3, 21, and 28, using a  
331 modified polyvinyl acetate (PVA) facemask device <sup>61, 62, 63</sup>, direct coughing onto an  
332 agar plate (coughing), and inserting the participants clean index finger into the front  
333 of the nose (nose poking). Further details of these methods are discussed in the  
334 supplementary section.

335

336 Nasal cells were collected weekly (5 visits) by scraping the inferior turbinate using  
337 nasal curette (Rhino-probe, Arlington Scientific, UK) as previously described <sup>64</sup>. Per  
338 individual and timepoint, two cures were collected from each nostril. Briefly, the  
339 four curette samples were immediately placed in a 15-ml falcon tube (Corning)  
340 containing 8-ml of precooled transport media (RPMI-1640 [Thermo Fisher Scientific  
341 Inc.] supplemented with 10% Fetal Bovine Saline [FBS], antibiotic/antimycotic [Sigma,  
342 USA], L-glutamine, non-essential amino acids, HERPES buffer and sodium pyruvate  
343 (all from Gibco, USA)).

344

345 Nasal-lining fluid was collected weekly (5 visits) using a non-invasive method that  
346 uses a synthetic absorptive matrix (SAM) strip (Hunts Development Ltd, UK). Briefly,  
347 the nasosorption strip was advanced up the lumen of the nasal cavity and held inside

348 the nostril for up to three minutes until soaked. The strip was then removed and  
349 placed in a microcentrifuge tube for storage at -80°C until processing.

350

### 351 *Microbiological culture and density quantification*

352 Standard microbiologic culture was used to determine the presence of *S.*  
353 *pneumoniae* from the nasal swab, nose poke swab, cough onto an agar plate and  
354 modified PVA facemask<sup>61, 62, 63</sup>. For modified PVA facemask processing, four PVA  
355 strips were removed from the mask using sterile technique and then dissolved in  
356 10ml Todd Hewitt broth with 5% yeast (THY) and then plated. We identified *S.*  
357 *pneumoniae* by their morphology and optochin sensitivity on a gentamicin-sheep  
358 blood agar plate (SBG; 5% sheep blood agar, 5µL gentamicin/mL) after an overnight  
359 incubation at 37 °C in 5% CO<sub>2</sub>. The bile solubility test was used on isolates with no or  
360 intermediate (zone diameter < 14mm) optochin susceptibility. Plates showing no *S.*  
361 *pneumoniae* growth were incubated for a further 24 hours before being reported as  
362 negative. A single colony of confirmed pneumococcus was selected and grown on a  
363 new SBG plate as before. Growth from this second plate was used for serotyping by  
364 latex agglutination (ImmuLex™ 23-valent Pneumotest; Statens Serum Institute,  
365 Denmark). This kit allows for differential identification of each PCV13 vaccine  
366 serotypes (VT) but not for differential identification of PCV13 non-vaccine serotypes  
367 (NVT); NVT and non-typeable isolates were, therefore, reported as NVT.

368 Pneumococcal density was quantified using microbiological culture serial dilutions<sup>65</sup>  
369 on a gentamicin-sheep blood agar plate (SBG; 5% sheep blood agar, 5µL  
370 gentamicin/mL) and results reported as colony forming units per millilitre (CFU/ml).

371

### 372 *AMR profiling*

373 Pure pneumococcal isolates were cultured on sheep blood agar without antibiotics  
374 (SBA), using an overnight incubation at 37 °C in 5% CO<sub>2</sub>. Growth from the SBA were  
375 emulsified in normal saline to match 0.5 McFarland turbidity standard and plated on  
376 sheep blood Muller Hinton agar plate without antibiotics (MHB) using a sterile cotton

377 swab. The antimicrobial susceptibility of pneumococcal isolates was assessed by the  
378 disk diffusion method (Oxoid, USA) for beta lactams antibiotic (oxacillin 1µg),  
379 macrolide-lincosamide-streptogramin (MLS) antibiotic (erythromycin 15µg),  
380 tetracycline antibiotic (tetracycline 30µg) and Trimethoprim/sulfamethoxazole (co-  
381 trimoxazole 1.25–23.75µg).

382

383 Beta lactams antibiotic susceptibility was confirmed by benzylpenicillin E-test  
384 minimum inhibitory concentration (MIC). E-test MICs were determined by  
385 suspending colonies from an overnight culture (incubation at 37 °C in 5% CO<sub>2</sub>) on  
386 SBA in saline, and the organism density was matched to a 0.5 McFarland turbidity  
387 standard. Using a sterile cotton swab, the organism suspension was plated onto  
388 MHB. E-test strips were applied to the surface of the plates according to the  
389 manufacturer's recommendations. Agar plates were incubated overnight at 37 °C in  
390 5% CO<sub>2</sub>. The MIC was defined as the lowest concentration of drug where the zone  
391 edge intersected the E-test strip.

392

393 Interpretation of results followed European Committee on Antimicrobial  
394 Susceptibility Testing (EUCAST) guidelines<sup>66</sup>. *Streptococcus pneumoniae* ATCC  
395 49619 was used as quality control. Multidrug resistance (MDR) was defined as non-  
396 susceptibility to agents in three or more above chemical classes of antibiotic.

397

### 398 *Flow cytometry analysis*

399 For immunophenotyping, nasal cells were dislodged from currettes by repeated  
400 pipetting and stained with far-red fluorescent amine reactive dye (34973A, 1:1000)  
401 from Invitrogen, and incubated for 15 minutes followed by the addition of a cocktail  
402 of BV605 anti-human CD326 (9C4, 324224, 1:50), PerCp-Cy5.5 anti-human CD45  
403 (HI30, 304028, 1:40), FITC anti-human CD66b (G10F5, 305104, 1:40), PE-Cy7 anti-  
404 human CD14 (M5E2, 301814, 1:40), APC-Cy7 anti-human CD3 (SK7, 344818, 1:40) and  
405 PE-eFlour® 610 anti-human CD62L (DREG-56, 61062942, 1:40), all from Bio legend

406 (UK). Samples were acquired on LSR FORTESSA flow cytometer equipped with  
407 FACSDIVA version 8.0.1 (BD Biosciences, UK) and analysed using Flowjo Version  
408 10.8.1 (BD Biosciences, USA). Abundance of immune cells was normalised as immune  
409 cell to epithelial cell ratio as previously reported <sup>67</sup>. All flow cytometry data are  
410 available.

411

#### 412 *Neutrophil-extracellular traps (NETs) enzyme linked-immunosorbent assay*

413 Nasosorption samples were eluted from stored nasosorption filters (Mucosal  
414 Diagnostics, Hunt Development (UK) Ltd, Midhurst, UK) using 200µL of elution buffer  
415 (Millipore) by centrifugation at 1500g for 10 minutes as previously described <sup>68</sup>. The  
416 eluate was cleared by further centrifugation at 1595g for 10 minutes. The eluate was  
417 then stored at -80°C until the day of the assay. The detection of NETs was performed  
418 by combining two commercial ELISA kits; ROCHE cell death ELISA kit (Sigma Aldrich,  
419 11920685001) and Human Elastase ELISA Kit (Hycult®Biotech, HK319). In-house  
420 developed PMA NETs were serially diluted (1:2) and used as standards, while  
421 nasosorption samples were diluted (1:4) using 1X dilution buffer from the Elastase  
422 ELISA Kit (Hycult®Biotech, HK319).

423

#### 424 *Myeloperoxidase (MPO) enzyme linked-immunosorbent assay*

425 Myeloperoxidase (MPO) enzyme linked immunosorbent assay was performed on  
426 eluted -80°C frozen nasal lining fluid samples as described in the manufacturer's user  
427 guide (Invitrogen, UK, BMS2038INST).

428

#### 429 *Statistical analysis*

430 Descriptive statistics are reported as numbers and proportions for categorical  
431 variables, and median and confidence interval for continuous data. Categorical  
432 variables were compared using  $\chi^2$  test, and continuous variables were compared  
433 using Mann-Whitney test. We fitted a univariate and multivariable regression model,  
434 accounting for multiple sampling (generalized linear mixed model), covariables used

435 for each model are detailed in the supplementary section. All data analyses were  
436 done in RStudio (Version 4.1.3, R Development Core Team, Vienna, Austria). Figures  
437 and tables were produced in R (v4.1.3), RStudio (v2022.02. 2+485.pro2 Prairie Trillium  
438 - April 27, 2022), ggplot2 (v3.3.5), lme4 (v1.1-28), and gtsummary (v1.5.2)<sup>69</sup>.  
439 Statistical significance level was reported at a p value of <0.05.

440

#### 441 **Data availability**

442 All data supporting these findings are available upon reasonable request.

443

#### 444 **References**

445

- 446 1. Ganaie, F. *et al.* A new pneumococcal capsule type, 10D, is the 100th serotype  
447 and has a large cps fragment from an oral streptococcus. *MBio* **11**, e00937-00920  
448 (2020).
- 449 2. Ganaie, F. *et al.* Structural, genetic, and serological elucidation of  
450 *Streptococcus pneumoniae* serogroup 24 serotypes: Discovery of a new serotype,  
451 24C, with a variable capsule structure. *Journal of Clinical Microbiology, JCM*. 00540-  
452 00521 (2021).
- 453 3. O'Brien, K.L. *et al.* Burden of disease caused by *Streptococcus pneumoniae* in  
454 children younger than 5 years: global estimates. *The Lancet* **374**, 893-902 (2009).
- 455 4. Weiser, J.N., Ferreira, D.M. & Paton, J.C. *Streptococcus pneumoniae*:  
456 transmission, colonization and invasion. *Nat Rev Microbiol* **16**, 355-367 (2018).
- 457 5. Waight, P.A. *et al.* Effect of the 13-valent pneumococcal conjugate vaccine on  
458 invasive pneumococcal disease in England and Wales 4 years after its introduction:  
459 an observational cohort study. *The Lancet Infectious Diseases* **15**, 535-543 (2015).
- 460 6. Moore, M.R. *et al.* Effect of use of 13-valent pneumococcal conjugate vaccine  
461 in children on invasive pneumococcal disease in children and adults in the USA:  
462 analysis of multisite, population-based surveillance. *The Lancet Infectious Diseases*  
463 **15**, 301-309 (2015).
- 464 7. Swarthout, T.D. *et al.* High residual carriage of vaccine-serotype *Streptococcus*  
465 *pneumoniae* after introduction of pneumococcal conjugate vaccine in Malawi. *Nature*  
466 *Communications* **11** (2020).
- 467 8. Usuf, E. *et al.* Pneumococcal carriage in rural Gambia prior to the introduction  
468 of pneumococcal conjugate vaccine: a population-based survey. *Trop Med Int Health*  
469 **20**, 871-879 (2015).
- 470 9. Bar-Zeev, N. *et al.* Impact and effectiveness of 13-valent pneumococcal  
471 conjugate vaccine on population incidence of vaccine and non-vaccine serotype  
472 invasive pneumococcal disease in Blantyre, Malawi, 2006–18: prospective



- 473 observational time-series and case-control studies. *The Lancet Global Health* **9**, e989-  
474 e998 (2021).
- 475 10. Glennie, S.J. *et al.* Defective Pneumococcal-Specific Th1 Responses in HIV-  
476 Infected Adults Precedes a Loss of Control of Pneumococcal Colonization. *Clinical*  
477 *Infectious Diseases* **56**, 291-299 (2013).
- 478 11. Heinsbroek, E. *et al.* Persisting high prevalence of pneumococcal carriage  
479 among HIV-infected adults receiving antiretroviral therapy in Malawi. *AIDS* **29**, 1837-  
480 1844 (2015).
- 481 12. Thindwa, D. *et al.* Risk factors for pneumococcal carriage in adults living with  
482 HIV on antiretroviral therapy in the infant pneumococcal vaccine era in Malawi.  
483 *medRxiv* (2022).
- 484 13. Lehtinen, S. *et al.* Evolution of antibiotic resistance is linked to any genetic  
485 mechanism affecting bacterial duration of carriage. *Proceedings of the National*  
486 *Academy of Sciences* **114**, 1075-1080 (2017).
- 487 14. Tonkin-Hill, G. *et al.* Pneumococcal within-host diversity during colonisation,  
488 transmission and treatment. Cold Spring Harbor Laboratory; 2022.
- 489 15. Chaguza, C. *et al.* Recombination in *Streptococcus pneumoniae* lineages  
490 increase with carriage duration and size of the polysaccharide capsule. *MBio* **7**,  
491 e01053-01016 (2016).
- 492 16. Organization, W.H. World Health Organization. Global antimicrobial resistance  
493 and use surveillance system (GLASS) report. (2021).
- 494 17. Organization, W.H. *Guidelines on post-exposure prophylaxis for HIV and the*  
495 *use of co-trimoxazole prophylaxis for HIV-related infections among adults,*  
496 *adolescents and children: recommendations for a public health approach: December*  
497 *2014 supplement to the 2013 consolidated guidelines on the use of antiretroviral*  
498 *drugs for treating and preventing HIV infection.* World Health Organization, 2014.
- 499 18. Laurens, M.B. *et al.* Revisiting Co-Trimoxazole Prophylaxis for African Adults in  
500 The Era of Antiretroviral Therapy: A Randomized Controlled Clinical Trial. *Clinical*  
501 *Infectious Diseases* (2021).
- 502 19. Ho, A. *et al.* Epidemiology of Severe Acute Respiratory Illness and Risk Factors  
503 for Influenza Infection and Clinical Severity among Adults in Malawi, 2011–2013. *The*  
504 *American Journal of Tropical Medicine and Hygiene* **99**, 772-779 (2018).
- 505 20. Ho, A. *et al.* Impact of Human Immunodeficiency Virus on the Burden and  
506 Severity of Influenza Illness in Malawian Adults: A Prospective Cohort and Parallel  
507 Case-Control Study. *Clinical Infectious Diseases* **66**, 865-876 (2018).
- 508 21. Manna, S. *et al.* Synergism and Antagonism of Bacterial-Viral Coinfection in  
509 the Upper Respiratory Tract. *mSphere* **7**, e0098421 (2022).
- 510 22. Karppinen, S. *et al.* Acquisition and Transmission of *Streptococcus*  
511 *pneumoniae* Are Facilitated during Rhinovirus Infection in Families with Children. *Am*  
512 *J Respir Crit Care Med* **196**, 1172-1180 (2017).
- 513 23. Peterson, I. *et al.* Respiratory Virus–Associated Severe Acute Respiratory Illness  
514 and Viral Clustering in Malawian Children in a Setting With a High Prevalence of HIV

- 515 Infection, Malaria, and Malnutrition. *Journal of Infectious Diseases* **214**, 1700-1711  
516 (2016).
- 517 24. Zawłocka, E., Czajkowska, M., Wrotek, A. & Jackowska, T. P388 RSV and  
518 influenza co-infections in children in three consecutive influenza epidemic seasons.  
519 *Archives of Disease in Childhood* **104**, A311 (2019).
- 520 25. Jochems, S.P. *et al.* Inflammation induced by influenza virus impairs human  
521 innate immune control of pneumococcus. *Nat Immunol* **19**, 1299-1308 (2018).
- 522 26. Murakami, D. *et al.* Exposure to Cigarette Smoke Enhances Pneumococcal  
523 Transmission Among Littermates in an Infant Mouse Model. *Front Cell Infect*  
524 *Microbiol* **11**, 651495 (2021).
- 525 27. Connor, V. *et al.* Hands are vehicles for transmission of Streptococcus  
526 pneumoniae in novel controlled human infection study. *European Respiratory Journal*  
527 **52**, 1800599 (2018).
- 528 28. Smith-Vaughan, H., Crichton, F., Beissbarth, J., Morris, P.S. & Leach, A.J.  
529 Survival of pneumococcus on hands and fomites. *BMC Research Notes* **1**, 112 (2008).
- 530 29. Wolter, N. *et al.* High Nasopharyngeal Pneumococcal Density, Increased by  
531 Viral Coinfection, Is Associated With Invasive Pneumococcal Pneumonia. *The Journal*  
532 *of Infectious Diseases* **210**, 1649-1657 (2014).
- 533 30. Carr, O.J.J. *et al.* Nasopharyngeal Pneumococcal Colonization Density Is  
534 Associated With Severe Pneumonia in Young Children in the Lao People's  
535 Democratic Republic. *The Journal of Infectious Diseases* **225**, 1266-1273 (2021).
- 536 31. Zangari, T., Ortigoza, M.B., Lokken-Toyli, K.L. & Weiser, J.N. Type I Interferon  
537 Signaling Is a Common Factor Driving Streptococcus pneumoniae and Influenza A  
538 Virus Shedding and Transmission. *mBio* **12** (2021).
- 539 32. Zafar, M.A. *et al.* Identification of Pneumococcal Factors Affecting  
540 Pneumococcal Shedding Shows that the *dlt* Locus Promotes Inflammation and  
541 Transmission. *mBio* **10** (2019).
- 542 33. Zafar, M.A., Wang, Y., Hamaguchi, S. & Weiser, J.N. Host-to-Host Transmission  
543 of Streptococcus pneumoniae Is Driven by Its Inflammatory Toxin, Pneumolysin. *Cell*  
544 *Host Microbe* **21**, 73-83 (2017).
- 545 34. Ekstedt, S., Larsson, O., Kumlien Georén, S. & Cardell, L.O. CD16(high)  
546 CD62L(dim) neutrophils induce nerve-mediated airway hyperreactivity. *Clin Exp*  
547 *Allergy* **50**, 756-759 (2020).
- 548 35. Ivetic, A., Hoskins Green, H.L. & Hart, S.J. L-selectin: A Major Regulator of  
549 Leukocyte Adhesion, Migration and Signaling. *Front Immunol* **10**, 1068 (2019).
- 550 36. Hodges, R.G. & Macleod, C.M. Epidemic Pneumococcal Pneumonia. II. The  
551 Influence of Population Characteristics and Environment. *American journal of hygiene*  
552 **44**, 193-206 (1946).
- 553 37. Hohwy, J., Reinholdt, J. & Kilian, M. Population dynamics of Streptococcus  
554 mitis in its natural habitat. *Infection and immunity* **69**, 6055-6063 (2001).
- 555 38. Jensen, A., Valdórrson, O., Frimodt-Møller, N., Hollingshead, S. & Kilian, M.  
556 Commensal streptococci serve as a reservoir for  $\beta$ -lactam resistance genes in

- 557 Streptococcus pneumoniae. *Antimicrobial agents and chemotherapy* **59**, 3529-3540  
558 (2015).
- 559 39. Ready, D., Bedi, R., Spratt, D., Mullany, P. & Wilson, M. Prevalence, proportions,  
560 and identities of antibiotic-resistant bacteria in the oral microflora of healthy  
561 children. *Microbial Drug Resistance* **9**, 367-372 (2003).
- 562 40. Kalizang'oma, A. *et al.* Streptococcus pneumoniae serotypes that frequently  
563 colonise the human nasopharynx are common recipients of penicillin-binding protein  
564 gene fragments from Streptococcus mitis. *Microb Genom* **7** (2021).
- 565 41. Jensen, A., Valdórsson, O., Frimodt-Møller, N., Hollingshead, S. & Kilian, M.  
566 Commensal streptococci serve as a reservoir for  $\beta$ -lactam resistance genes in  
567 Streptococcus pneumoniae. *Antimicrob Agents Chemother* **59**, 3529-3540 (2015).
- 568 42. Sauerbier, J., Maurer, P., Rieger, M. & Hakenbeck, R. Streptococcus  
569 pneumoniae R6 interspecies transformation: genetic analysis of penicillin resistance  
570 determinants and genome-wide recombination events. *Mol Microbiol* **86**, 692-706  
571 (2012).
- 572 43. Tonkin-Hill, G. *et al.* Pneumococcal within-host diversity during colonization,  
573 transmission and treatment. *Nature Microbiology* (2022).
- 574 44. Pemba, L. *et al.* Impact of cotrimoxazole on non-susceptibility to antibiotics in  
575 Streptococcus pneumoniae carriage isolates among HIV-infected mineworkers in  
576 South Africa. *Journal of Infection* **56**, 171-178 (2008).
- 577 45. Seid, M. *et al.* Does cotrimoxazole prophylaxis in HIV patients increase the  
578 drug resistance of pneumococci? A comparative cross-sectional study in southern  
579 Ethiopia. *PLOS ONE* **15**, e0243054 (2020).
- 580 46. Liñares, J., Perez, J., Garau, J., Murgui, L. & Martin, R. Comparative  
581 susceptibilities of penicillin-resistant pneumococci to co-trimoxazole, vancomycin,  
582 rifampicin and fourteen  $\beta$ -lactam antibiotics. *Journal of Antimicrobial Chemotherapy*  
583 **13**, 353-359 (1984).
- 584 47. Monteith, A.J., Miller, J.M., Maxwell, C.N., Chazin, W.J. & Skaar, E.P. Neutrophil  
585 extracellular traps enhance macrophage killing of bacterial pathogens. *Sci Adv* **7**,  
586 eabj2101 (2021).
- 587 48. Nikolaou, E. *et al.* Experimental Human Challenge Defines Distinct  
588 Pneumococcal Kinetic Profiles and Mucosal Responses between Colonized and Non-  
589 Colonized Adults. *mBio* **12** (2021).
- 590 49. Dong, Y. *et al.* TLR4 regulates ROS and autophagy to control neutrophil  
591 extracellular traps formation against Streptococcus pneumoniae in acute otitis media.  
592 *Pediatr Res* **89**, 785-794 (2021).
- 593 50. Weiser, J.N., Ferreira, D.M. & Paton, J.C. Streptococcus pneumoniae:  
594 transmission, colonization and invasion. *Nature Reviews Microbiology* **16**, 355-367  
595 (2018).
- 596 51. Sakatani, H. *et al.* A Novel Pneumococcal Surface Protein K of  
597 Nonencapsulated Streptococcus pneumoniae Promotes Transmission among  
598 Littermates in an Infant Mouse Model with Influenza A Virus Coinfection. *Infect*  
599 *Immun* **90**, e0062221 (2022).

- 600 52. Siegel, S.J., Roche, A.M. & Weiser, J.N. Influenza promotes pneumococcal  
601 growth during coinfection by providing host sialylated substrates as a nutrient  
602 source. *Cell Host Microbe* **16**, 55-67 (2014).
- 603 53. Hammond, A.J. *et al.* Neuraminidase B controls neuraminidase A-dependent  
604 mucus production and evasion. *PLoS Pathog* **17**, e1009158 (2021).
- 605 54. Wu, M. *et al.* Epithelium-derived IL17A Promotes Cigarette Smoke-induced  
606 Inflammation and Mucus Hyperproduction. *Am J Respir Cell Mol Biol* **65**, 581-592  
607 (2021).
- 608 55. Sender, V., Hentrich, K. & Henriques-Normark, B. Virus-Induced Changes of  
609 the Respiratory Tract Environment Promote Secondary Infections With *Streptococcus*  
610 *pneumoniae*. *Front Cell Infect Microbiol* **11**, 643326 (2021).
- 611 56. Jambo, K.C. *et al.* Bronchoalveolar CD4+ T cell responses to respiratory  
612 antigens are impaired in HIV-infected adults. *Thorax* **66**, 375-382 (2011).
- 613 57. Ministry of Health and Population , M. Malawi Clinical HIV Guidelines. In:  
614 Ministry of Health and Population , M., editor.; 2018.
- 615 58. French, N. *et al.* A trial of a 7-valent pneumococcal conjugate vaccine in HIV-  
616 infected adults. *N Engl J Med* **362**, 812-822 (2010).
- 617 59. Satzke, C. *et al.* Standard method for detecting upper respiratory carriage of  
618 *Streptococcus pneumoniae*: Updated recommendations from the World Health  
619 Organization Pneumococcal Carriage Working Group. *Vaccine* **32**, 165-179 (2013).
- 620 60. Ministry of Health, M. Clinical management of HIV in Children and Adults;  
621 2011.
- 622 61. Al-Taie, A. *et al.* 3-D printed polyvinyl alcohol matrix for detection of airborne  
623 pathogens in respiratory bacterial infections. *Microbiological research* **241**, 126587  
624 (2020).
- 625 62. Williams, C.M. *et al.* Exhaled SARS-CoV-2 quantified by face-mask sampling in  
626 hospitalised patients with COVID-19. *Journal of Infection* **82**, 253-259 (2021).
- 627 63. Hu, B. Recent advances in facemask devices for in vivo sampling of human  
628 exhaled breath aerosols and inhalable environmental exposures. *TrAC Trends in*  
629 *Analytical Chemistry*, 116600 (2022).
- 630 64. Jochems, S.P. *et al.* Novel analysis of immune cells from nasal microbiopsy  
631 demonstrates reliable, reproducible data for immune populations, and superior  
632 cytokine detection compared to nasal wash. *PloS one* **12**, e0169805 (2017).
- 633 65. Miles, A.A., Misra, S.S. & Irwin, J.O. The estimation of the bactericidal power of  
634 the blood. *Epidemiology and Infection* **38**, 732-749 (1938).
- 635 66. Testing, T.E.C.o.A.S. Breakpoint tables for interpretation of MICs and zone  
636 diameters; 2022.
- 637 67. Roukens, A.H.E. *et al.* Prolonged activation of nasal immune cell populations  
638 and development of tissue-resident SARS-CoV-2-specific CD8+ T cell responses  
639 following COVID-19. *Nature Immunology* **23**, 23-32 (2022).
- 640 68. Morton, B. *et al.* Distinct clinical and immunological profiles of patients with  
641 evidence of SARS-CoV-2 infection in sub-Saharan Africa. *Nat Commun* **12**, 3554  
642 (2021).

643 69. Larmarange, D.D.S.a.K.W.a.M.C.a.J.A.L.a.J. Reproducible Summary Tables with  
644 the gtsurvey Package. *The R Journal* **13**, 570-580 (2021).

645

646

## 647 **Acknowledgements**

648 The authors thank all study participants, and the staff of the Queen Elizabeth Central  
649 Hospital (QECH) Lighthouse and Gateway Clinic, for their support and co-operation  
650 during the study. This work was supported by the National Institute for Health  
651 Research (NIHR) [16/136/46]. KCJ is supported by an MRC African Research Leader  
652 award [MR/T008822/1]. RSH is a NIHR senior investigator. The views expressed in this  
653 publication are those of the authors and not necessarily those of the NIHR or the UK  
654 government. A Wellcome Strategic award number 206545/Z/17/Z supports MLW.  
655 The funders were not involved in the design of the study; in the collection, analysis,  
656 and interpretation of the data; and in writing the manuscript. The findings and  
657 conclusions in this report are those of the authors and do not necessarily represent  
658 the official position of the funders.

659

## 660 **Author contributions**

661 The author contributions were as follows: Methodology: K.C.J., R.S.H. and N.F.  
662 Investigation: L.S., J.P., N.M., N.K., T.N., A.K., M.K., and G.S. Data analysis: K.C.J., L.S.,  
663 and J.P. Interpretation: K.C.J., L.S., J.P., R.S.H., B.K.A, T.D.S., and N.F. Data curation: L.S.  
664 and J.P. Project administration: N.M., N.K. and K.C.J. Sample collection: A.K., M.K., and  
665 G.S. Writing: L.S., J.P., and K.C.J. Conceptualisation and supervision: K.C.J., R.S.H., B.K.A,  
666 and N.F. All authors read and approved the final manuscript.

667

## 668 *Corresponding author*

669 Correspondence to Kondwani C. Jambo

670

## 671 **Competing interests**

672 The authors declare no competing interests

673 **Figures**

A.

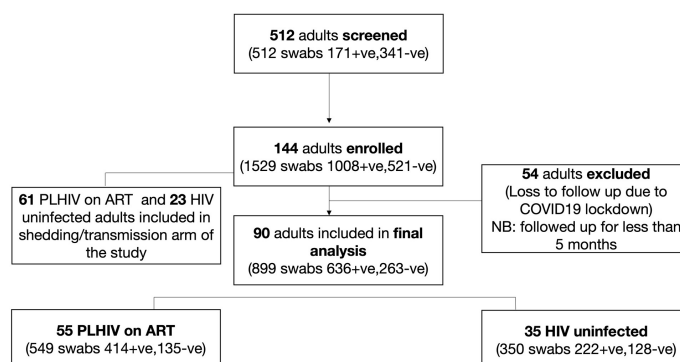

B.

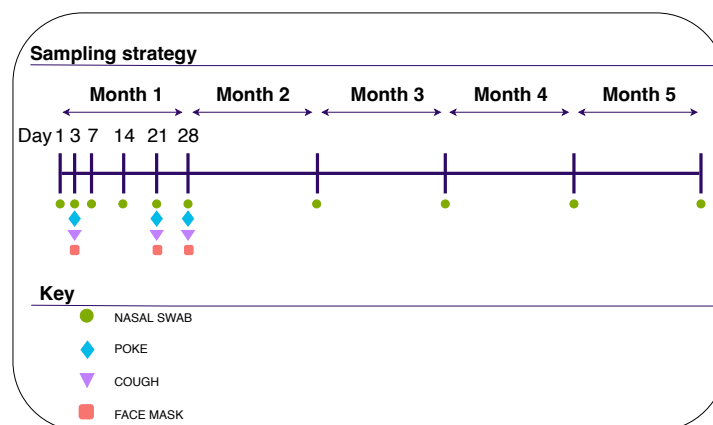

674  
675  
676  
677  
678  
679  
680  
681

**Figure 1. Recruitment flow diagram and study design.** A) Flow diagram showing the number of adults and pneumococcal samples included in the analysis among PLHIV on ART and HIV uninfected participants. B) Sampling strategy, showing longitudinal follow up of study participants and sample collection points.

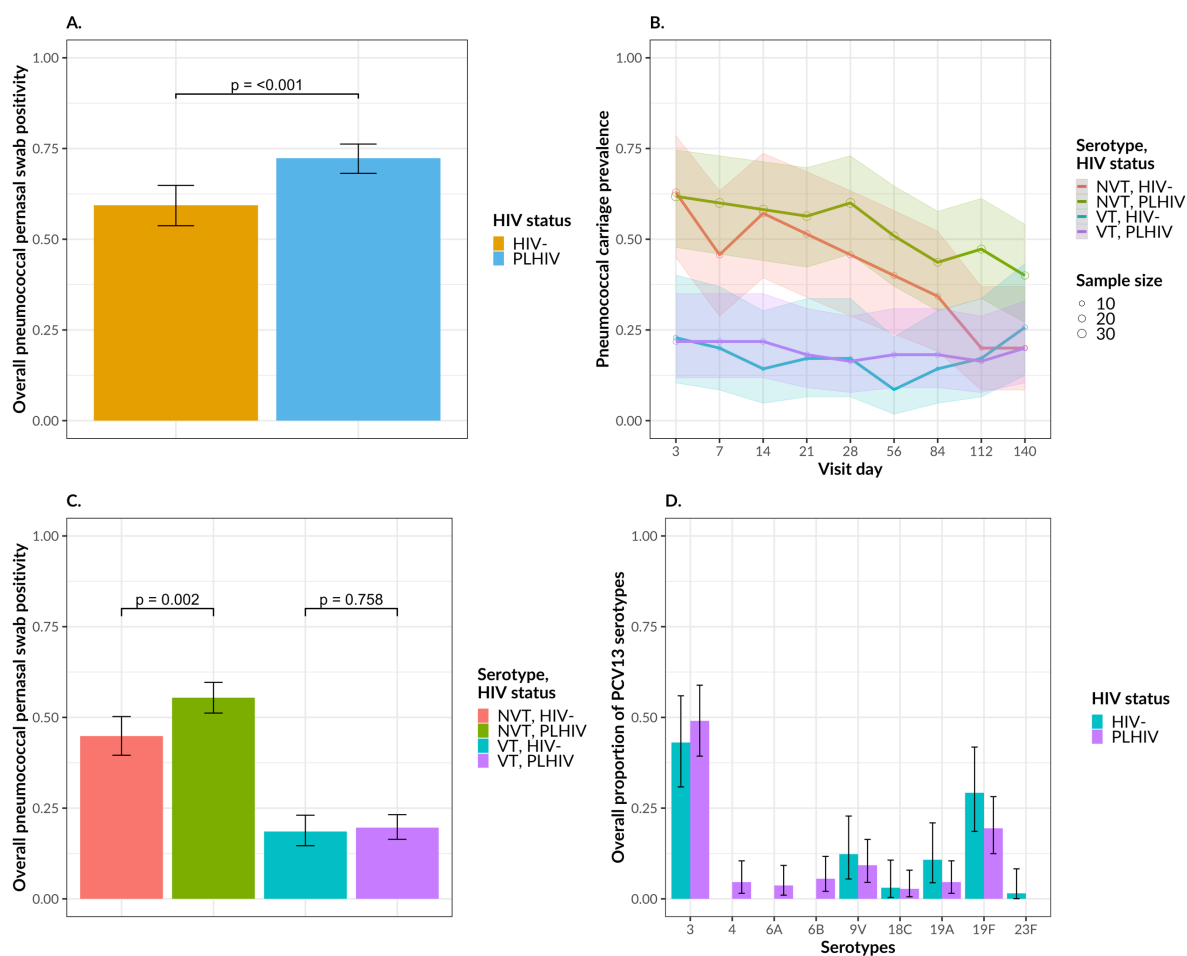

682

683 **Figure 2. Overall (VT+NVT) pneumococcal swab positivity among PLHIV and HIV-**  
 684 **uninfected adults.** A) HIV-stratified pneumococcal swab positivity. B) HIV and  
 685 serogroup stratified pneumococcal swab positivity by different nasopharyngeal  
 686 sampling visits. C) HIV and serogroup stratified pneumococcal swab positivity. D)  
 687 HIV-stratified proportion of PCV13 serotypes. The denominator for each serotype is  
 688 the total PCV13 serotypes in each group. Black vertical lines represent 95%  
 689 confidence intervals. Data were analysed using Chi-square test (HIV-uninfected:  
 690  $n=35$ , PLHIV:  $n=55$ ). Source data are provided as a Source Data file. PCV13,  
 691 pneumococcal conjugated vaccine 13; ART, antiretroviral therapy; NVT non-PCV13  
 692 serotype; VT, PCV13 serotypes

693

694

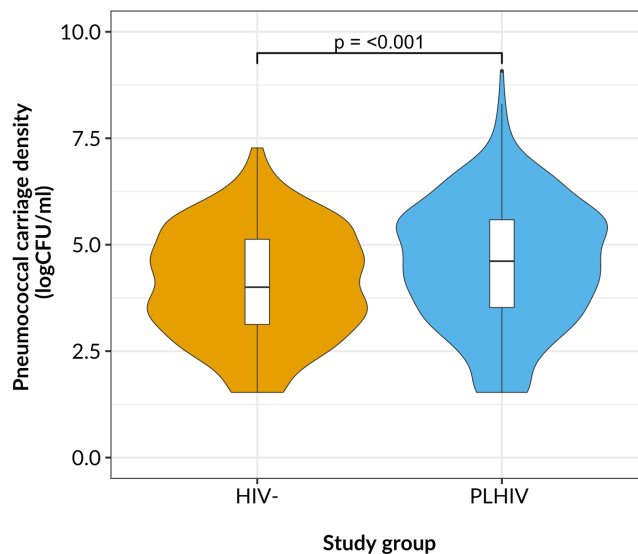

695

696 **Figure 3. Pneumococcal carriage density among PLHIV and HIV-uninfected**  
697 **participants.** Log median carriage density stratified by HIV status for 5 months study  
698 follow-up time. For all boxplots, box boundaries correspond to 25<sup>th</sup> and 75<sup>th</sup>  
699 percentiles; whiskers extend to a maximum of 1.5x the inter-quartile range, with  
700 values outside the box and whiskers being outliers. Data were analysed using  
701 Wilcoxon test (HIV-uninfected: n=35, PLHIV: n=55). Source data are provided as a  
702 Source Data file. ART, antiretroviral therapy; CFU, colony forming units

703

704

705

706

707

708

709

710

711

712

713

714

715



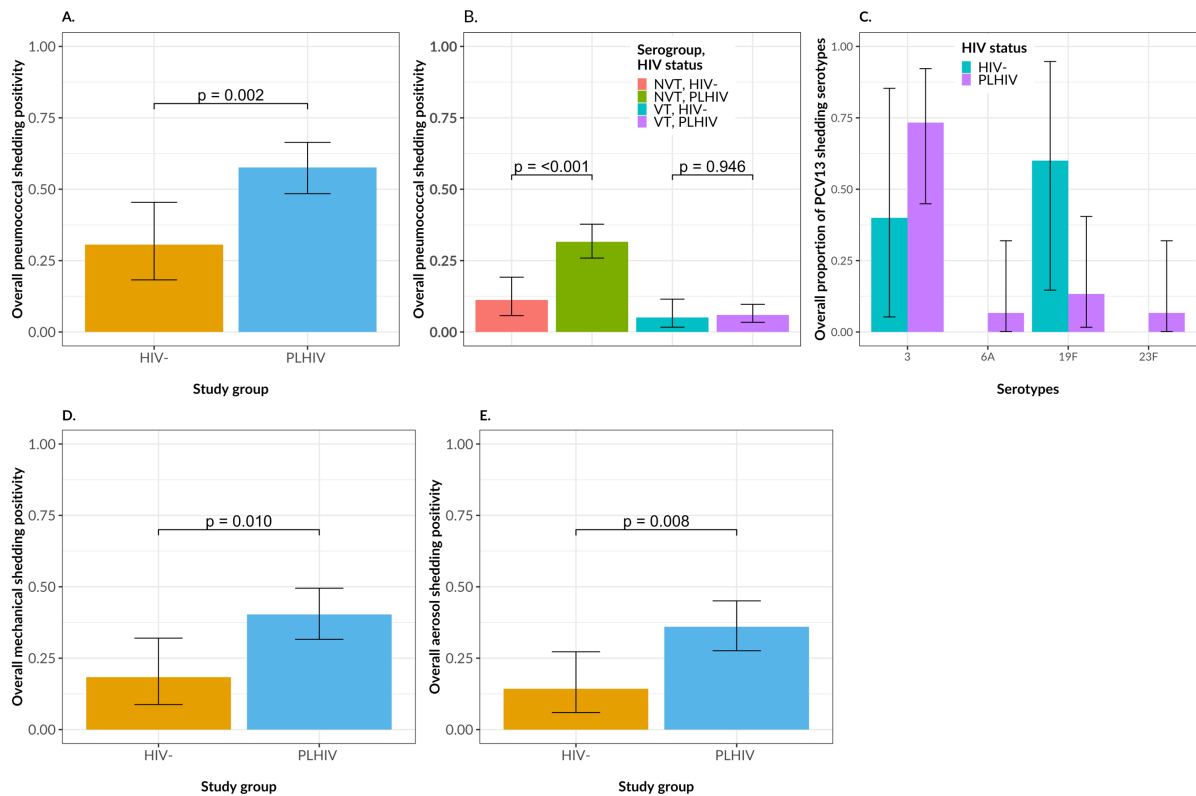

716  
717

718 **Figure 4. Pneumococcal shedding among PLHIV and HIV-uninfected adults.**  
 719 Pneumococcal shedding was defined as presence of viable pneumococci following  
 720 microbiological culture of samples collected through nose poking (mechanical) and  
 721 coughing or facemask sampling (aerosol). A) Overall pneumococcal shedding  
 722 positivity stratified by HIV status. B). Overall pneumococcal shedding positivity  
 723 stratified by HIV status and serogroup. C). Overall pneumococcal shedding positivity  
 724 stratified by HIV status and PCV13 serotypes, the denominator for each serotype is  
 725 the total PCV13 serotypes in each group. D). Pneumococcal mechanical shedding  
 726 positivity stratified by HIV status E). Pneumococcal aerosol shedding positivity  
 727 stratified by HIV status. The vertical bars represent median and horizontal lines  
 728 represent confidence intervals (CI) (black lines). Data were analysed using Chi-square  
 729 test (HIV-uninfected: n=23, PLHIV: n=61). Source data are provided as a Source Data  
 730 file. ART, antiretroviral therapy

731  
732  
733  
734  
735  
736

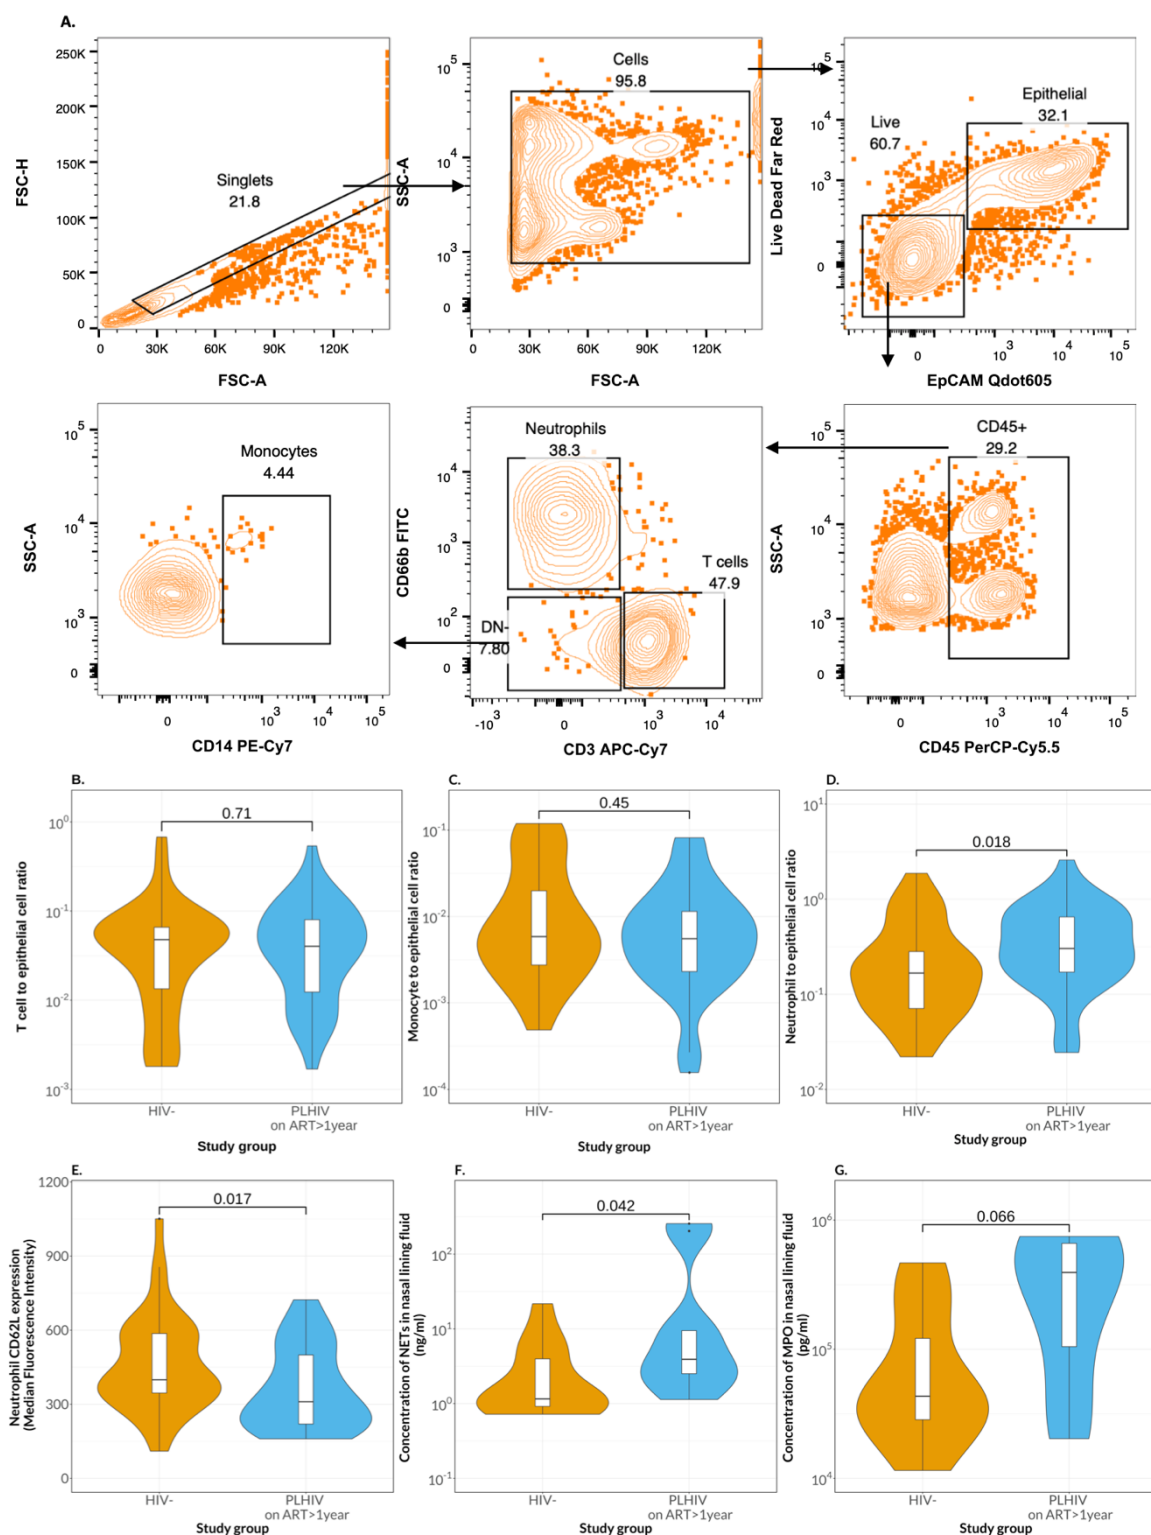

737

738 **Figure 5. Nasal immune responses in adults with or without HIV.** Immune cell  
 739 profiling was done on nasal curette-collected mucosa cells using flow cytometry-  
 740 based immunophenotyping, while concentration of NETs and MPO were measured in  
 741 nasal lining fluid using ELISAs, in HIV-uninfected adults and PLHIV. Samples were  
 742 collected weekly for 4 weeks in all participants. A) Representative flow cytometry plot  
 743 from an HIV-uninfected participant showing a gating strategy for the identification of  
 744 immune cells in the nasal mucosa. B-D) Plots showing abundance of immune cell

745 subsets at all time points in the nasal mucosa of HIV-uninfected and PLHIV. Data was  
746 normalised as immune cell to epithelial cell ratio. E) Median fluorescence Intensity  
747 (MFI) of CD62L expression on neutrophils between HIV-uninfected and PLHIV at all  
748 time points. For all boxplots, box boundaries correspond to 25<sup>th</sup> and 75<sup>th</sup> percentiles;  
749 whiskers extend to a maximum of 1.5x the inter-quartile range, with values outside  
750 the box and whiskers being outliers. Data were analysed using Wilcoxon test (HIV-  
751 uninfected: n=10, PLHIV: n=9). Source data are provided as a Source Data file. ART,  
752 antiretroviral therapy

753

754

755

756

757

758

759

760

761

762

763

764

765

766

767

768

769

770

771

772

773

774

775

776

777 Tables

778 Table 1

| Table 1. Baseline characteristics             |                           |                            |                      |
|-----------------------------------------------|---------------------------|----------------------------|----------------------|
| Characteristic                                | HIV-, N = 35 <sup>1</sup> | PLHIV, N = 55 <sup>1</sup> | p-value <sup>2</sup> |
| <b>Sex</b>                                    |                           |                            | 0.7                  |
| Female                                        | 25 (71%)                  | 41 (75%)                   |                      |
| Male                                          | 10 (29%)                  | 14 (25%)                   |                      |
| <b>Age group</b>                              |                           |                            | <b>0.049</b>         |
| 18-25                                         | 12 (34%)                  | 10 (18%)                   |                      |
| 26-35                                         | 16 (46%)                  | 21 (38%)                   |                      |
| 36-45                                         | 7 (20%)                   | 24 (44%)                   |                      |
| <b>Number of U5 children per household</b>    |                           |                            | 0.7                  |
| 1                                             | 26 (74%)                  | 45 (82%)                   |                      |
| 2                                             | 8 (23%)                   | 9 (16%)                    |                      |
| 3                                             | 1 (2.9%)                  | 1 (1.8%)                   |                      |
| <b>Socioeconomic status<sup>3</sup></b>       |                           |                            | <b>0.005</b>         |
| Median (IQR)                                  | 6.00 (3.50, 7.50)         | 4.00 (2.00, 5.00)          |                      |
| <b>CD4 count (Cells/<math>\mu</math>l)</b>    |                           |                            | <b>&lt;0.001</b>     |
| Median (IQR)                                  | 760 (652, 927)            | 514 (332, 750)             |                      |
| <b>ART duration (Years)</b>                   |                           |                            |                      |
| Median (IQR)                                  | NA (NA, NA)               | 5.8 (3.4, 11.3)            |                      |
| <b>HIV viral load (Copies/ml)<sup>4</sup></b> |                           |                            |                      |
| Median (IQR)                                  | NA (NA, NA)               | 39 (39, 18,928)            |                      |

<sup>1</sup> n (%)

<sup>2</sup> Pearson's Chi-squared test; Fisher's exact test; Wilcoxon rank sum test

<sup>3</sup> Socioeconomic status score based a possession index which is calculated as a sum of positive responses for household ownership of each of the fifteen different functioning items such as watch, radio, bank account, iron (charcoal), sewing machine (electric), mobile phone, CD player, fan (electric), bednet, mattress, bed, bicycle, motorcycle, car, and television

<sup>4</sup> i.e. Only 10 PLHIV on ART>1yr had a detectable Viral load

779

780

781

782

783

784

785

786

787

788

789

790

791

792 **Table 2**

Table 2. Pneumococcal density  $\leq 2010$ CFU/ml vs Pneumococcal density  $> 2010$ CFU/ml

| Characteristic                          | Univariate      |                     |              | Multivariable   |                     |              |
|-----------------------------------------|-----------------|---------------------|--------------|-----------------|---------------------|--------------|
|                                         | OR <sup>1</sup> | 95% CI <sup>1</sup> | p-value      | OR <sup>1</sup> | 95% CI <sup>1</sup> | p-value      |
| <b>HIV status</b>                       |                 |                     |              |                 |                     |              |
| HIV-                                    | —               | —                   |              | —               | —                   |              |
| PLHIV                                   | 1.55            | 1.04, 2.31          | <b>0.030</b> | 1.62            | 1.06, 2.49          | <b>0.027</b> |
| <b>Sex</b>                              |                 |                     |              |                 |                     |              |
| Female                                  | —               | —                   |              | —               | —                   |              |
| Male                                    | 0.92            | 0.59, 1.43          | 0.7          | 0.85            | 0.53, 1.36          | 0.5          |
| <b>Age group</b>                        |                 |                     |              |                 |                     |              |
| 18-25                                   | —               | —                   |              | —               | —                   |              |
| 26-35                                   | 0.84            | 0.50, 1.40          | 0.5          | 0.69            | 0.40, 1.20          | 0.2          |
| 36-45                                   | 0.94            | 0.56, 1.59          | 0.8          | 0.69            | 0.38, 1.25          | 0.2          |
| <b>Season</b>                           |                 |                     |              |                 |                     |              |
| Cooldry                                 | —               | —                   |              | —               | —                   |              |
| Hotwet                                  | 0.82            | 0.55, 1.23          | 0.3          | 0.78            | 0.52, 1.17          | 0.2          |
| <b>Socioeconomic status<sup>2</sup></b> |                 |                     |              |                 |                     |              |
| Medium/high ses (> 3)                   | —               | —                   |              | —               | —                   |              |
| Low ses ( $\leq 3$ )                    | 1.21            | 0.81, 1.80          | 0.4          | 1.19            | 0.78, 1.83          | 0.4          |

<sup>1</sup> OR = Odds Ratio, CI = Confidence Interval

<sup>2</sup> Socioeconomic status score based a possession index which is calculated as a sum of positive responses for household ownership of each of the fifteen different functioning items such as watch, radio, bank account, iron (charcoal), sewing machine (electric), mobile phone, CD player, fan (electric), bednet, mattress, bed, bicycle, motorcycle, car, and television. Middle and high SES were combined

793  
794  
795  
796  
797  
798  
799  
800  
801  
802  
803  
804  
805  
806  
807

808 **Table 3**

| Table 3. Factors associated with pneumococcal shedding |                 |                     |                  |                 |                     |              |
|--------------------------------------------------------|-----------------|---------------------|------------------|-----------------|---------------------|--------------|
| Characteristic                                         | Univariate      |                     |                  | Multivariable   |                     |              |
|                                                        | OR <sup>1</sup> | 95% CI <sup>1</sup> | p-value          | OR <sup>1</sup> | 95% CI <sup>1</sup> | p-value      |
| <b>HIV status</b>                                      |                 |                     |                  |                 |                     |              |
| HIV-                                                   | —               | —                   |                  | —               | —                   |              |
| PLHIV                                                  | 2.24            | 1.22, 4.13          | <b>0.010</b>     | 2.44            | 1.04, 5.69          | <b>0.039</b> |
| <b>Sex</b>                                             |                 |                     |                  |                 |                     |              |
| Female                                                 | —               | —                   |                  | —               | —                   |              |
| Male                                                   | 0.89            | 0.52, 1.52          | 0.7              | 1.24            | 0.61, 2.53          | 0.6          |
| <b>Age group</b>                                       |                 |                     |                  |                 |                     |              |
| 18-25                                                  | —               | —                   |                  | —               | —                   |              |
| 26-35                                                  | 1.85            | 0.90, 3.80          | 0.093            | 1.62            | 0.64, 4.13          | 0.3          |
| 36-45                                                  | 2.13            | 1.01, 4.46          | <b>0.046</b>     | 2.01            | 0.76, 5.34          | 0.2          |
| <b>Nasalswab carriage density (CFU/ml)</b>             |                 |                     |                  |                 |                     |              |
| Low density <=2010                                     | —               | —                   |                  | —               | —                   |              |
| Medium/High density >2010                              | 3.42            | 1.75, 6.67          | <b>&lt;0.001</b> | 3.37            | 1.56, 7.29          | <b>0.002</b> |
| <b>Season</b>                                          |                 |                     |                  |                 |                     |              |
| Cold/dry                                               | —               | —                   |                  | —               | —                   |              |
| Hot/wet                                                | 1.42            | 0.83, 2.43          | 0.2              | 1.18            | 0.58, 2.39          | 0.6          |
| <b>Socioeconomic status<sup>2</sup></b>                |                 |                     |                  |                 |                     |              |
| Medium/high ses (> 3)                                  | —               | —                   |                  | —               | —                   |              |
| Low ses (<= 3)                                         | 0.59            | 0.34, 1.00          | <b>0.052</b>     | 0.64            | 0.31, 1.31          | 0.2          |

<sup>1</sup> OR = Odds Ratio, CI = Confidence Interval

<sup>2</sup> Socioeconomic status score based a possession index which is calculated as a sum of positive responses for household ownership of each of the fifteen different functioning items such as watch, radio, bank account, iron (charcoal), sewing machine (electric), mobile phone, CD player, fan (electric), bednet, mattress, bed, bicycle, motorcycle, car, and television. Middle and high SES were combined

809

810 \* Pneumococcal shedding was defined as presence of viable pneumococci following microbiological  
 811 culture of samples collected through nose poking (mechanical) and coughing or facemask sampling  
 812 (aerosol).

813

814

815

816

817

818

819

820

821

822

823

824

825

826 Table 4

Table 4. Baseline pneumococcal carriage isolates antibiogram

| Characteristic         | HIV-, N = 35 <sup>1</sup> | PLHIV, N = 57 <sup>1</sup> | p-value <sup>2</sup> |
|------------------------|---------------------------|----------------------------|----------------------|
| <b>Cotrimoxazole</b>   |                           |                            | <b>0.002</b>         |
| Susceptible            | 8 (24%)                   | 1 (2.0%)                   |                      |
| non-susceptible        | 26 (76%)                  | 50 (98%)                   |                      |
| <b>Oxacillin</b>       |                           |                            | 0.5                  |
| Susceptible            | 15 (43%)                  | 26 (51%)                   |                      |
| non-susceptible        | 20 (57%)                  | 25 (49%)                   |                      |
| <b>Tetracycline</b>    |                           |                            | 0.2                  |
| Susceptible            | 16 (47%)                  | 32 (63%)                   |                      |
| non-susceptible        | 18 (53%)                  | 19 (37%)                   |                      |
| <b>Erythromycin</b>    |                           |                            | <b>0.058</b>         |
| Susceptible            | 21 (62%)                  | 41 (80%)                   |                      |
| non-susceptible        | 13 (38%)                  | 10 (20%)                   |                      |
| <b>MDR<sup>3</sup></b> |                           |                            | 0.5                  |
| non MDR                | 26 (76%)                  | 42 (82%)                   |                      |
| MDR <sup>3</sup>       | 8 (24%)                   | 9 (18%)                    |                      |

<sup>1</sup> n (%)  
<sup>2</sup> Fisher's exact test; Pearson's Chi-squared test  
<sup>3</sup> i.e. Oxacillin is excluded from MDR definition

827  
828  
829  
830  
831  
832  
833  
834  
835  
836  
837  
838  
839  
840  
841  
842  
843

844 Table 5

Table 5. Pneumococcal shedding isolates antibiogram among PLHIV

| Characteristic                      | Aerosol shedding vs Nasopharyngeal carriage |                                              |                      | Mechanical shedding vs Nasopharyngeal carriage |                                              |         |
|-------------------------------------|---------------------------------------------|----------------------------------------------|----------------------|------------------------------------------------|----------------------------------------------|---------|
|                                     | Aerosol shedding, N = 44 <sup>1</sup>       | Nasopharyngeal carriage, N = 44 <sup>1</sup> | p-value <sup>2</sup> | Mechanical shedding, N = 50 <sup>1</sup>       | Nasopharyngeal carriage, N = 50 <sup>1</sup> | p-value |
| <b>Tetracycline</b>                 | 27 (61%)                                    | 11 (26%)                                     | <b>&lt;0.001</b>     | 16 (32%)                                       | 15 (30%)                                     | 0.8     |
| <b>Erythromycin</b>                 | 19 (43%)                                    | 12 (28%)                                     | 0.14                 | 14 (28%)                                       | 16 (32%)                                     | 0.7     |
| <b>Cotrimoxazole</b>                | 41 (93%)                                    | 41 (95%)                                     | >0.9                 | 47 (94%)                                       | 46 (92%)                                     | >0.9    |
| <b>Benzylpenicillin<sup>3</sup></b> | 27 (61%)                                    | 14 (32%)                                     | <b>0.010</b>         | 19 (38%)                                       | 14 (28%)                                     | 0.4     |
| <b>MDR</b>                          | 28 (64%)                                    | 13 (30%)                                     | <b>0.001</b>         | 15 (30%)                                       | 15 (30%)                                     | >0.9    |

<sup>1</sup> n (%)  
<sup>2</sup> Pearson's Chi-squared test; Fisher's exact test  
<sup>3</sup> i.e. Minimum inhibitory concentration

845  
846  
847  
848  
849  
850  
851  
852  
853  
854  
855  
856  
857  
858  
859  
860  
861
